# Supplementary material for: The Role of Local Ancestry Adjustment in Association Studies Using Admixed Populations
Source: PubMed Central journal article supplement — Genet Epidemiol. Author manuscript; Available in PMC 2016 Oct 25. (PMC5079159; doi:10.1002/gepi.21835), 2014-07-15
Supplement: NIHMS824021-supplement-Supplemental_information.pdf [file NIHMS824021-supplement-Supplemental_information.pdf]

## Supplemental Figures.

**Figure S1. Top PCs capture the variation in global ancestry.**

Global ancestry was estimated by principal component analysis based on genotypes from the pooled HapMap III panels (CEU, YRI, ASN, MEX and ASW), using 20% of genome-wide markers. Plotting the data by top PCs clearly partitioned the data by ethnic groups.

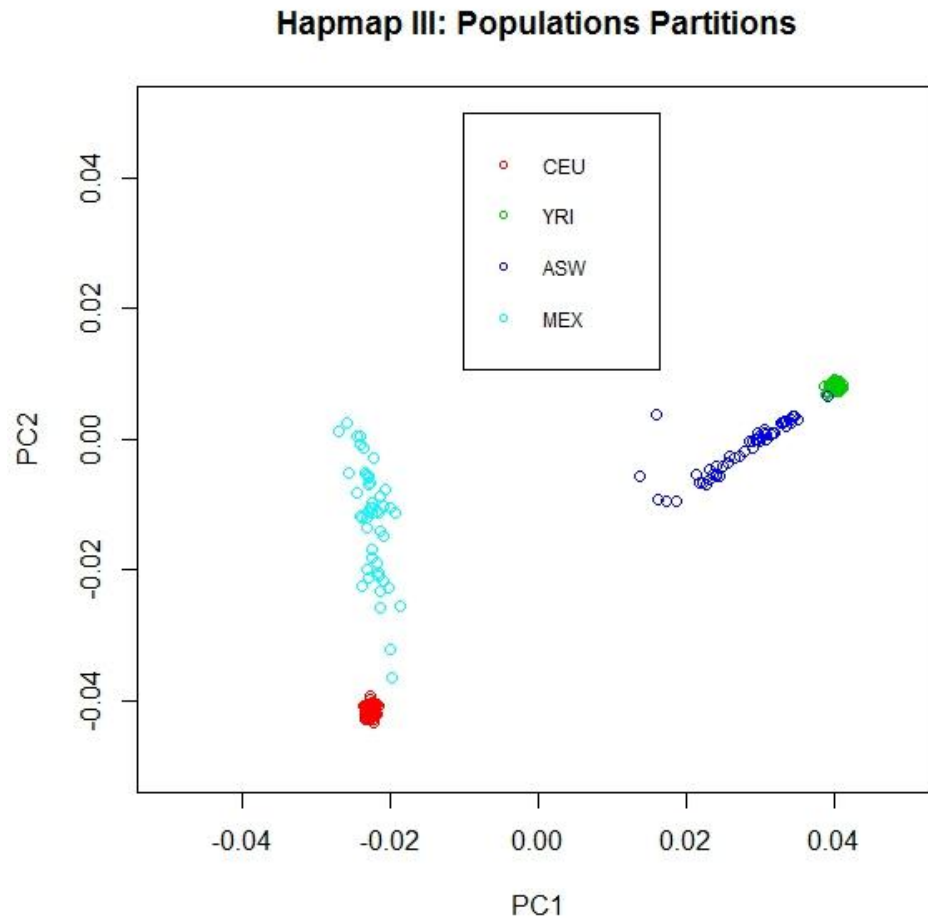

Figure S2. Expected conditional variance of  $Adx|G$  and  $Adx|L$ .

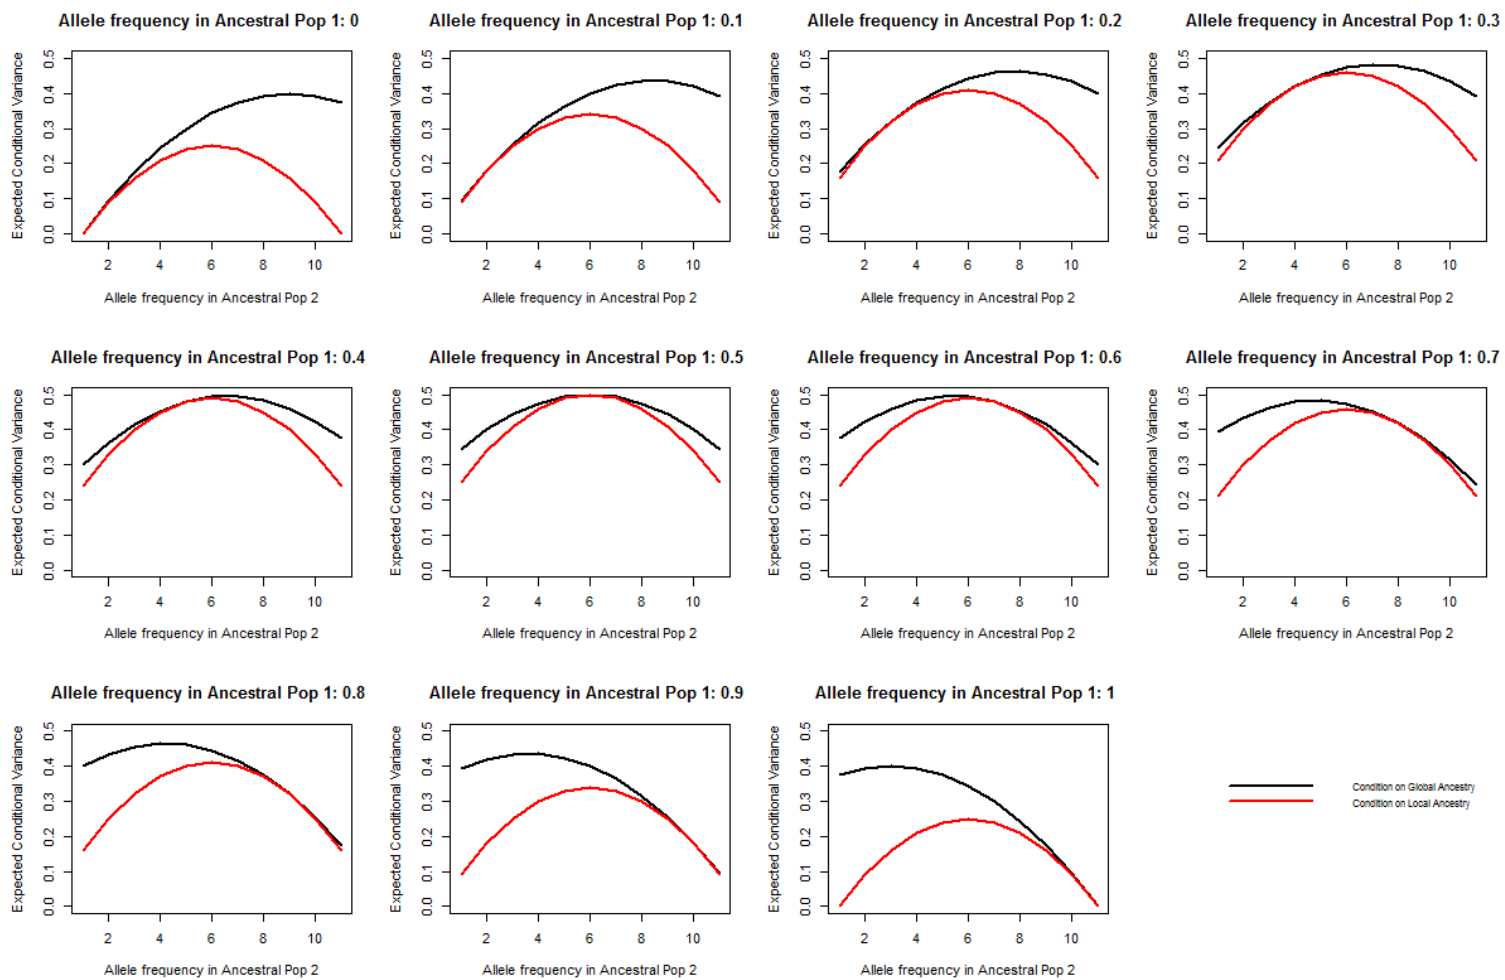

## Supplemental Tables

**Table S1. Number of differentiated SNPs in admixed populations, and average effective sample size with local ancestry adjustment relative to global ancestry adjustment in ASW.**

|                        | [0-0.3) | [0.3,0.5) | [0.5,1) |
|------------------------|---------|-----------|---------|
| ASW (CEU vs YRI)       | 9366    | 2175      | 558     |
| Var(ASW L)/Var(ASW G)* | 0.979   | 0.891     | 0.765   |
| MEX (CEU vs ASN)       | 10512   | 1399      | 188     |

\*Assuming 5 generations of admixture 1:4(CEU vs YRI).

**Table S2. Distance (Kb) to the furthest surrogate stratified by difference of allele frequencies.**

**a. Allele frequencies differ within [0, 0.3) at causal loci.**

|                                                                     | 1st<br>Quartile | Median | 3rd Quartile |
|---------------------------------------------------------------------|-----------------|--------|--------------|
| 80%YRI + 20% CEU                                                    | 9.99            | 24.25  | 52.42        |
| ASW                                                                 | 8.98            | 23.99  | 57.44        |
| ASW   G                                                             | 9.22            | 24.13  | 58.82        |
| ASW   L                                                             | 8.67            | 22.66  | 53.35        |
| $\text{Var}(\text{ASW} \text{L})/\text{Var}(\text{ASW} \text{G})^*$ | 0.969           | 0.988  | 0.997        |
| 50%ASN + 50%CEU                                                     | 15.65           | 33.25  | 65.12        |
| CEU                                                                 | 20.80           | 46.20  | 93.71        |
| MEX                                                                 | 20.68           | 47.62  | 113.8        |
| MEX   G                                                             | 20.23           | 45.76  | 105.70       |
| Sim ANC                                                             | 39.38           | 67.5   | 138          |
| Sim ADX                                                             | 43.12           | 76.8   | 180          |
| Sim ADX   G                                                         | 39.37           | 69.38  | 136          |
| Sim ADX   L                                                         | 39.38           | 67.5   | 129.4        |

\*Assuming 5 generations of admixture 1:4(CEU vs YRI).

**b. Allele frequencies differ within [0.3, 0.5] at causal loci.**

|                        | 1st Quartile | Median | 3rd Quartile |
|------------------------|--------------|--------|--------------|
| 80%YRI + 20% CEU       | 10.53        | 24.56  | 55.43        |
| ASW                    | 11.54        | 31.88  | 118.3        |
| ASW   G                | 11.84        | 31.04  | 87.21        |
| ASW   L                | 9.46         | 24.38  | 56.10        |
| Var(ASW L)/Var(ASW G)* | 0.871        | 0.908  | 0.932        |
| 50%ASN + 50%CEU        | 15.30        | 30.80  | 64.31        |
| CEU                    | 20.73        | 41.66  | 94.29        |
| MEX                    | 22.96        | 49.79  | 150.90       |
| MEX   G                | 21.38        | 45.59  | 122.00       |
| Sim ANC                | 35.62        | 60     | 97.5         |
| Sim ADX                | 63.75        | 138.8  | 1752.0       |
| Sim ADX   G            | 41.25        | 69.38  | 116.2        |
| Sim ADX   L            | 33.75        | 56.25  | 88.12        |

\*Assuming 5 generations of admixture 1:4(CEU vs YRI).

c. Allele frequencies differ within [0.5, 1) at causal loci.

|                        | 1st Quartile | Median | 3rd Quartile |
|------------------------|--------------|--------|--------------|
| 80%YRI + 20% CEU       | 10.75        | 29.13  | 55.84        |
| ASW                    | 19.45        | 56.74  | 1299.0       |
| ASW   G                | 17.01        | 48.37  | 334.0        |
| ASW   L                | 9.52         | 25.40  | 56.20        |
| Var(ASW L)/Var(ASW G)* | 0.729        | 0.793  | 0.832        |
| 50%ASN + 50%CEU        | 14.63        | 34.05  | 67.46        |
| CEU                    | 24.47        | 43.62  | 80.53        |
| MEX                    | 25.49        | 53.23  | 117.70       |
| MEX   G                | 23.92        | 46.16  | 117.70       |
| Sim ANC                | 28.12        | 56     | 94.22        |
| Sim ADX                | 893.4        | 3191.0 | 4212.0       |
| Sim ADX   G            | 52.50        | 99.38  | 354.4        |
| Sim ADX   L            | 26.25        | 48.75  | 80.62        |

\*Assuming 5 generations of admixture 1:4(CEU vs YRI).
